# Supplementary material for: Theranostic system based on NaY(Mn)F4:Yb/Er upconversion nanoparticles with multi-drug resistance reversing ability
Source: Royal Society of Chemistry journal article supplement (doi:10.1039/c8tb00416a), 2018-01-01
Supplement: c8tb00416a1.pdf [file c8tb00416a1.pdf]

## **Supporting Information**

### **A Theranostic System Based on NaY(Mn)F<sub>4</sub>:Yb/Er Upconversion Nanoparticles with multi-drug resistance (MDR) reversing ability**

Xiaoqin Chen, Jing Sun, Huan Zhao, Ke Yang, Yuda Zhu, Hongrong Luo, Kui Yu, Hongsong Fan\*, Xingdong Zhang

National Engineering Research Center for Biomaterials, Sichuan University, Chengdu 610065, P. R. China

\*Email - hsfan@scu.edu.cn

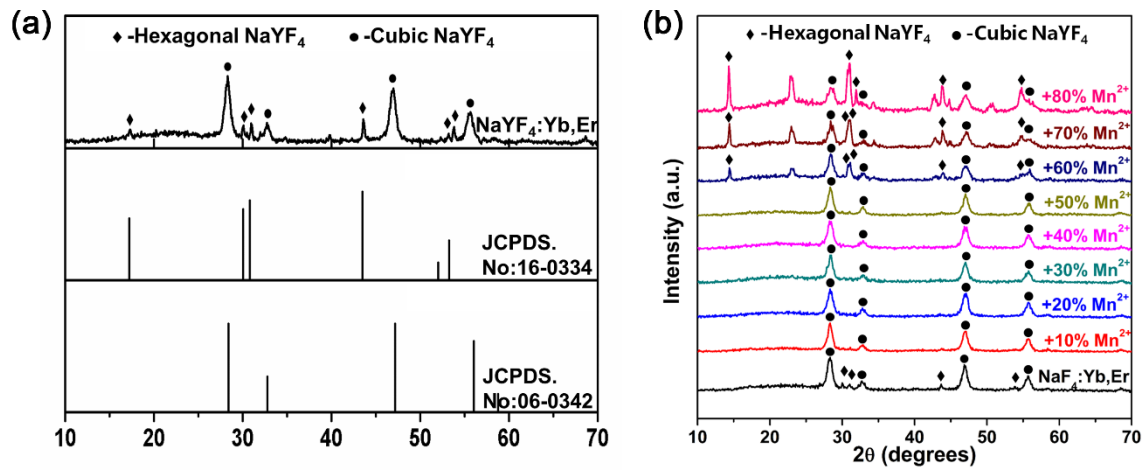

**Figure S1.** (a) XRD patterns of  $\text{NaYF}_4:\text{Yb/Er}$  UN and the corresponding PDF cards. (b)

XRD patterns of  $\text{NaY}(\text{Mn})\text{F}_4:\text{Yb/Er}$  UN with 0%-80%  $\text{Mn}^{2+}$  doping.

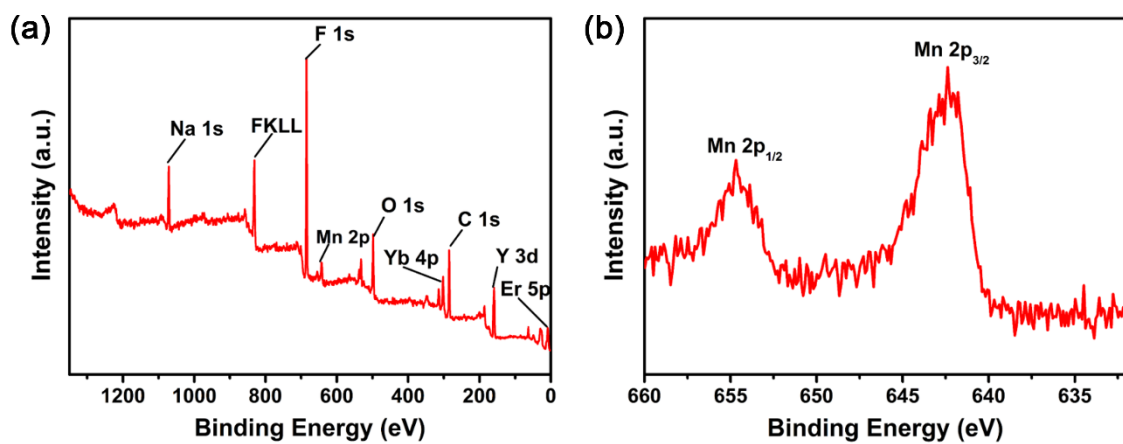

**Figure S2.** (a) XPS spectrum of NaY(Mn)F<sub>4</sub>:Yb/Er UN with 50% Mn<sup>2+</sup> doping. (b) High-resolution of XPS spectrum of Mn 2p. The Mn 2p<sub>1/2</sub> and Mn 2p<sub>3/2</sub> peaks located at 653.08 and 641.38 eV respectively.

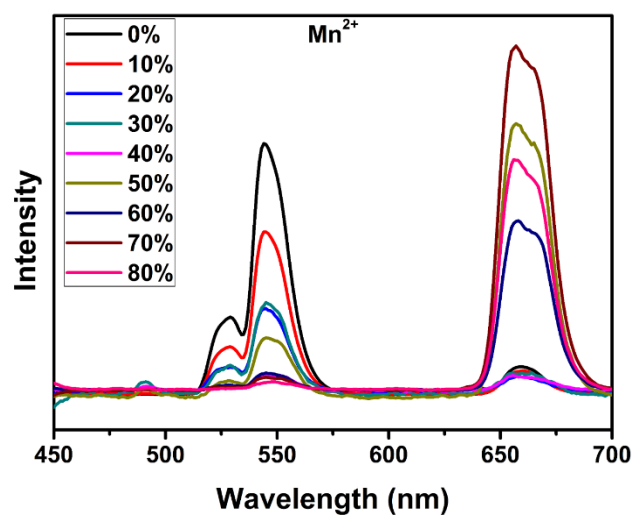

**Figure S3.** Upconversion emission spectra of NaY(Mn)F<sub>4</sub>:Yb/Er nanocrystals with 0%-80% Mn<sup>2+</sup> doping. (EX=980 nm).

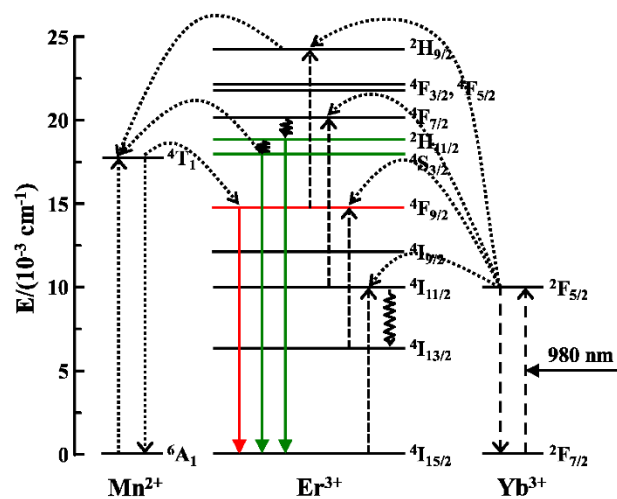

**Figure S4.** The simplified energy level diagram of  $\text{Mn}^{2+}$ -doped UN for the photon upconversion under NIR excitations .

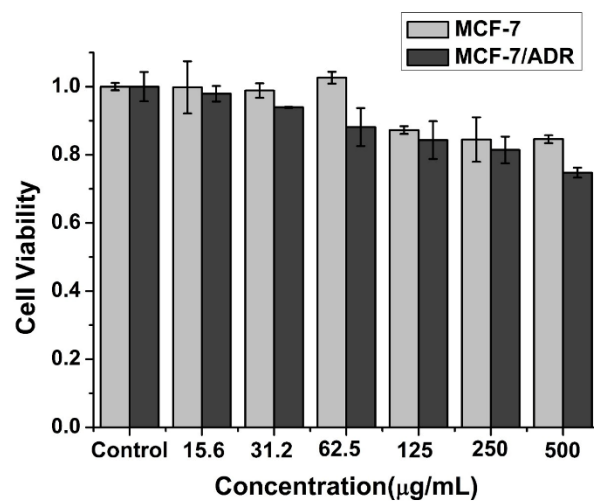

**Figure S5.** Cytotoxicity Evaluation: cell viabilities of MCF-7 and MCF-7/ADR after incubated with UNT for 24 h at different concentrations (0-500 µg/mL) respectively.

**Table S1.** Zeta potential values of the nanoparticles .

|                       | UN           | UNT          | D-UNT       |
|-----------------------|--------------|--------------|-------------|
| <b>Zeta potential</b> | 21.6±0.51 mV | 39.6±0.78 mV | 40.8±1.1 mV |
